# Supplementary material for: Cobalt vanadium chalcogenide microspheres decorated with dendrite-like fiber nanostructures for flexible wire-typed energy conversion and storage microdevices
Source: Royal Society of Chemistry journal article supplement (doi:10.1039/d2nr01247b), 2022-01-01
Supplement: d2nr01247b2.pdf [file d2nr01247b2.pdf]

**Supporting Information**

**Cobalt vanadium chalcogenide microspheres decorated with dendrite-like  
fiber nanostructure for flexible wire-typed energy conversion and storage  
microdevices**

Leila Naderi, Saeed Shahrokhian\*

*Department of Chemistry, Sharif University of Technology, Tehran 11155–9516, Iran*

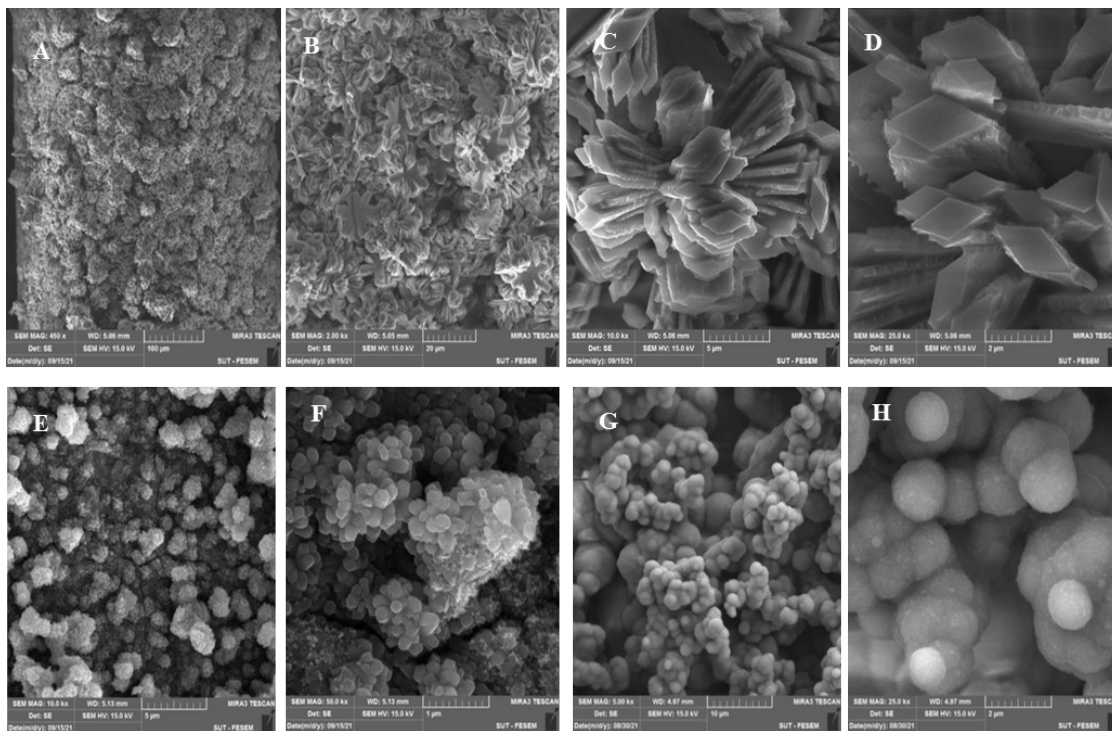

**Fig. S1.** FE-SEM images of rhombus-like CoV10@CW (A-D), CoV01@CW nanocube (E, F) and CoV11@CW microspheres (G, H) with different magnifications

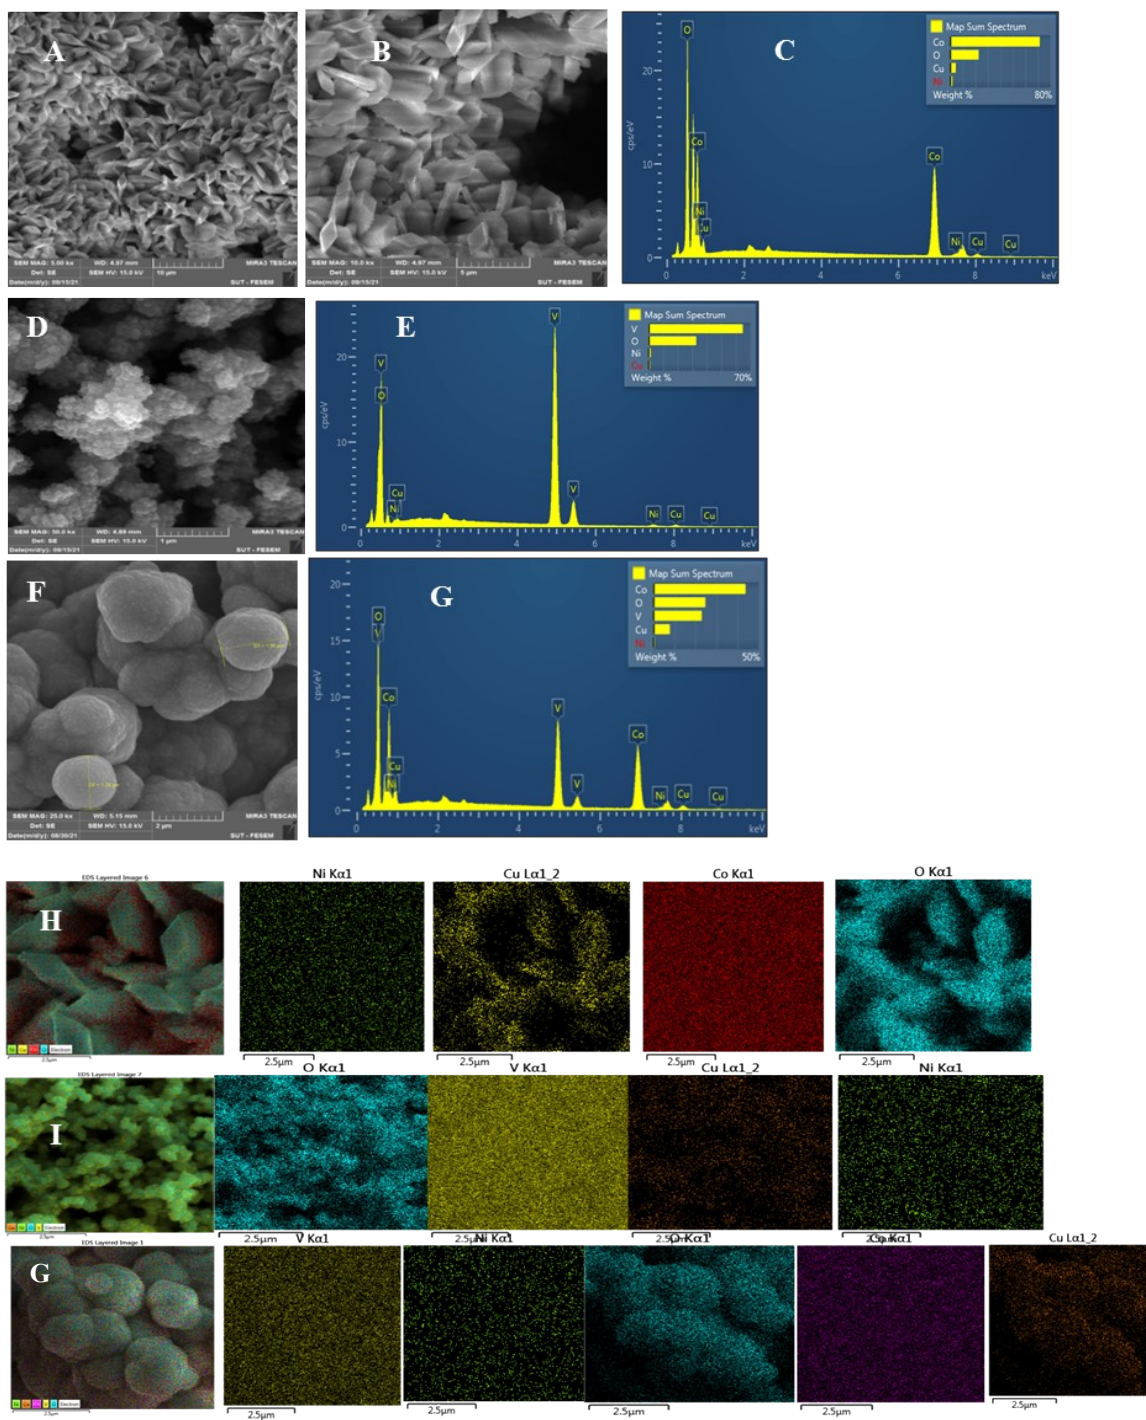

**Fig. S2.** FE-SEM images of rhombus- like CoV10/NiCu@CW with different magnifications (A and B), EDX spectra of rhombus- like CoV10/NiCu@CW (C), FE-SEM image (D) and EDX spectra (G) of CoV01/NiCu@CW nanocube, FE-SEM image (F) and EDX spectra (G) of CoVLDH/NiCu@CW microsphere, mapping images of rhombus- like CoV10/NiCu@CW (H), CoV01/NiCu@CW nanocube (I), and CoVLDH/NiCu@CW microsphere (J).

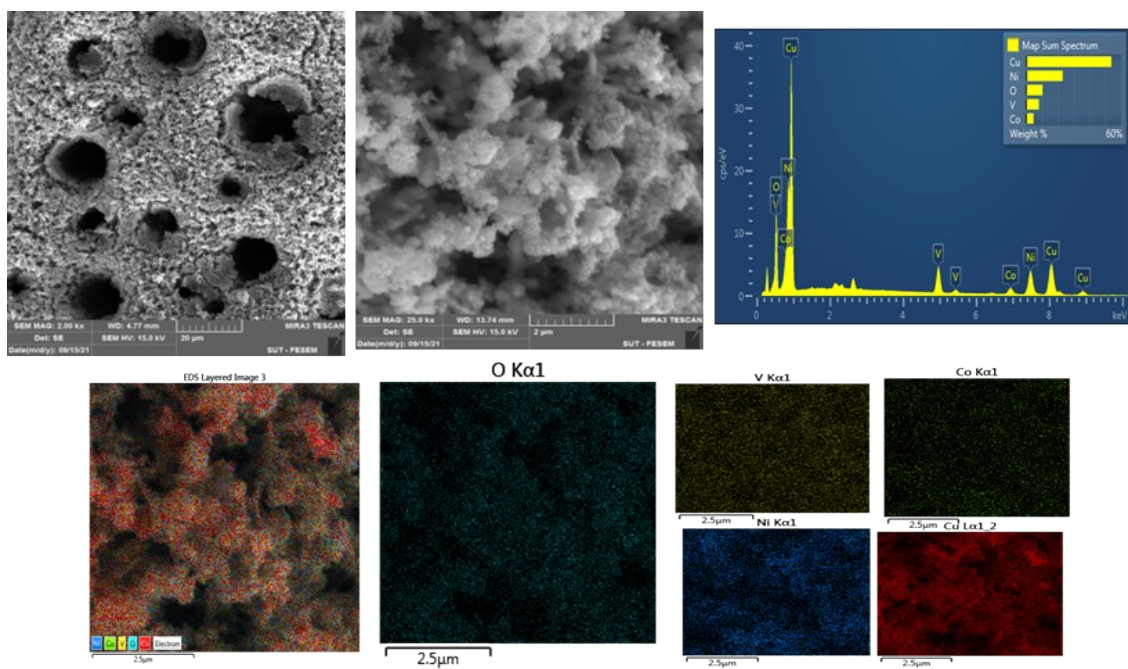

**Fig. S3.** FE-SEM images of e-CoV LDH/NiCu@CW with different magnifications, EDX spectra and mapping images.

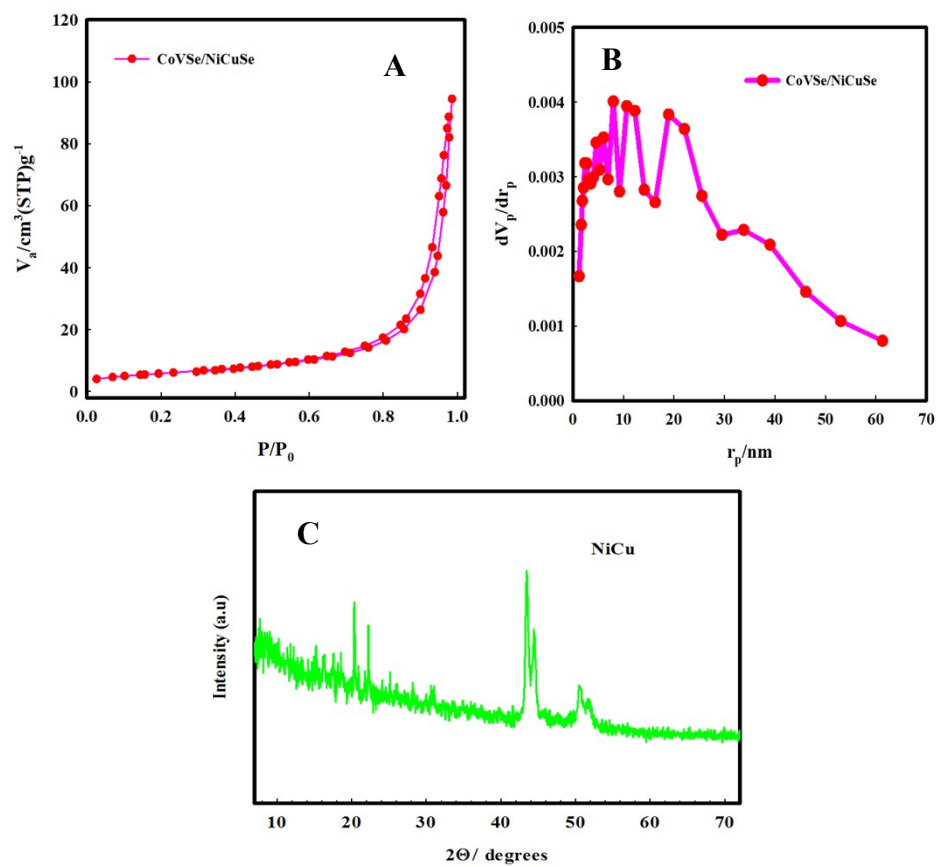

**Fig. S4.** (A)  $\text{N}_2$  adsorption–desorption isotherm of the CoVSe/NiCuSe, (B) the related pore size distribution and (c) XRD spectra of NiCu

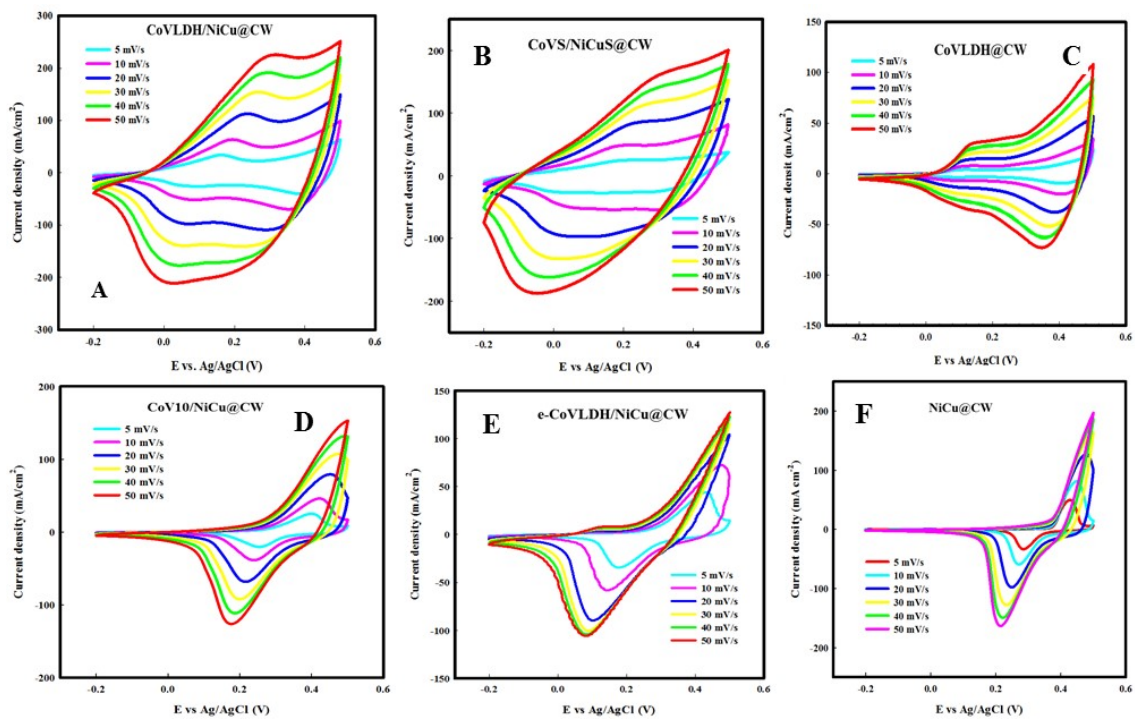

Fig. S5. CV curves of prepared fiber electrodes in 1M KOH electrolyte

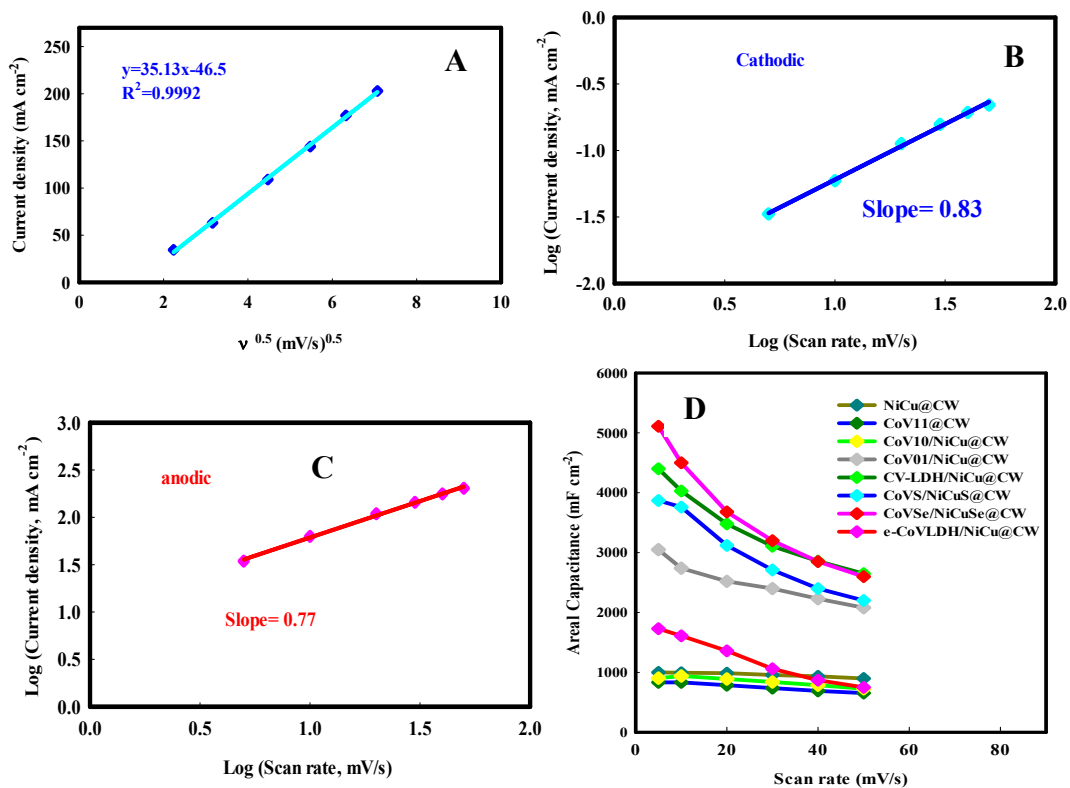

**Fig. S6.** (A) The peak current of CoVSe/NiCuSe@CW electrode as a function of the square root of scan rate, Logarithm relationship between the scan rate and (B) cathodic, and (C) anodic peak current. (D) Areal specific capacitance of as-prepared fiber electrodes as a function of scan rate

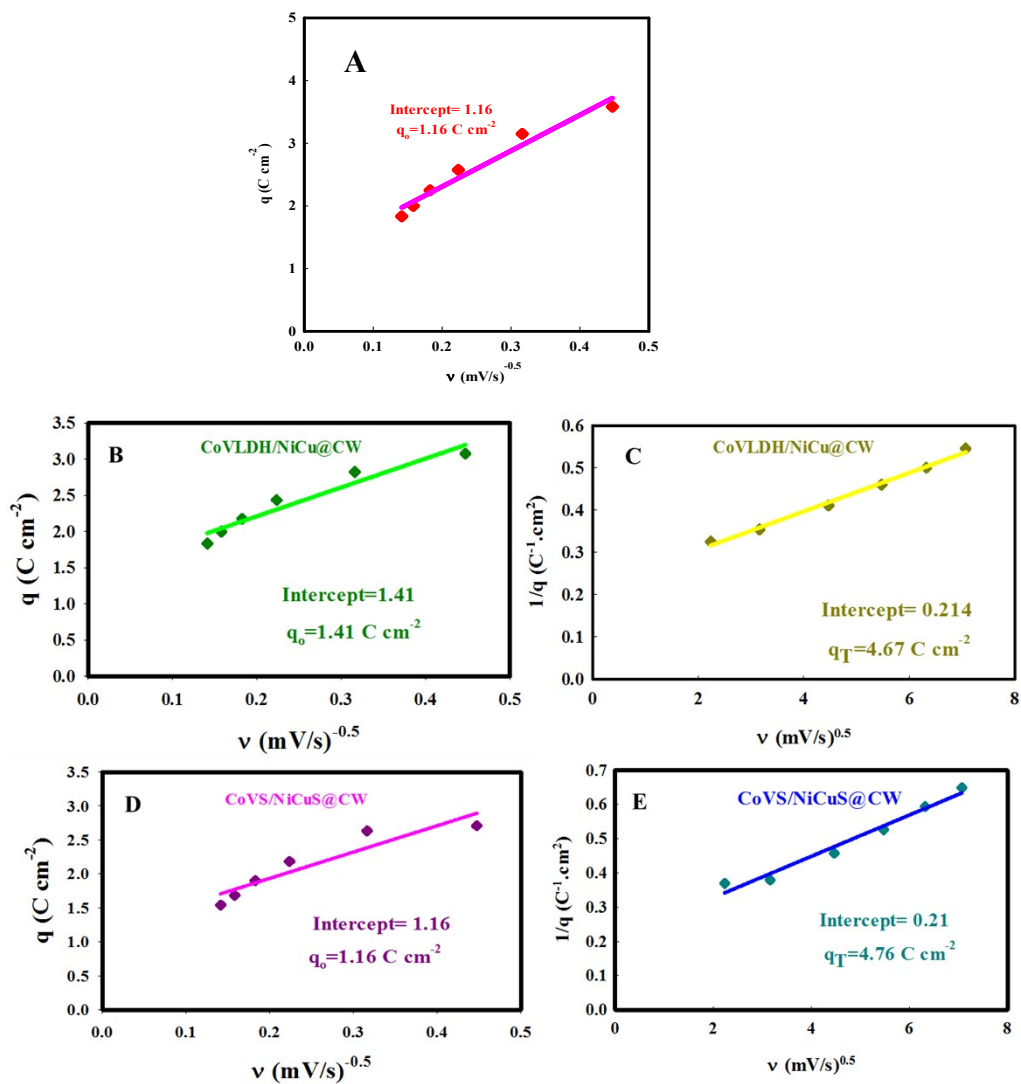

**Fig. S7.** Trasatti plots of  $q(v)$  against  $v^{-0.5}$  of the CoVSe/NiCuSe (A).Trasatti plots (B, D) plots of  $q(t)$  against  $v^{-0.5}$ , (C, E)  $1/q(t)$  against  $v^{0.5}$ , for CoVLDH/NiCu@CW and CoVS/NiCuS@CW fiber electrodes



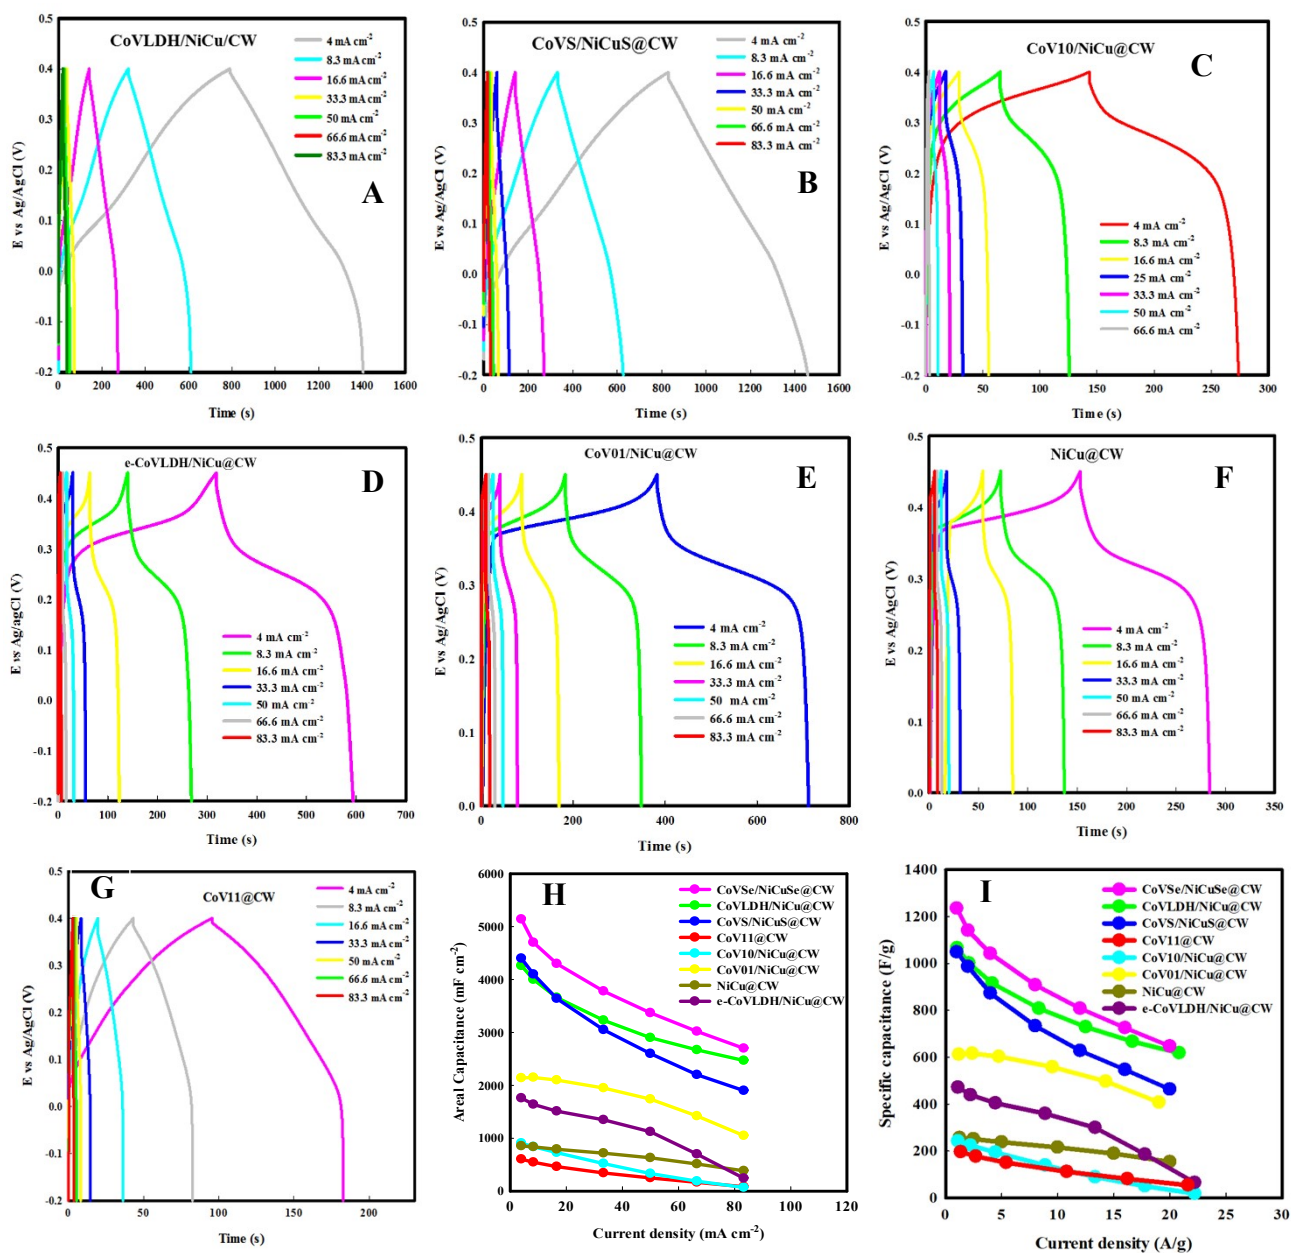

**Fig. S8.** GCD curves of as-prepared fiber electrodes in 1M KOH electrolyte (A-G), Areal specific capacitance of as-prepared fiber electrodes as a function of scan rate (H), Gravimetric capacitance of the different electrodes as function of current density (I)

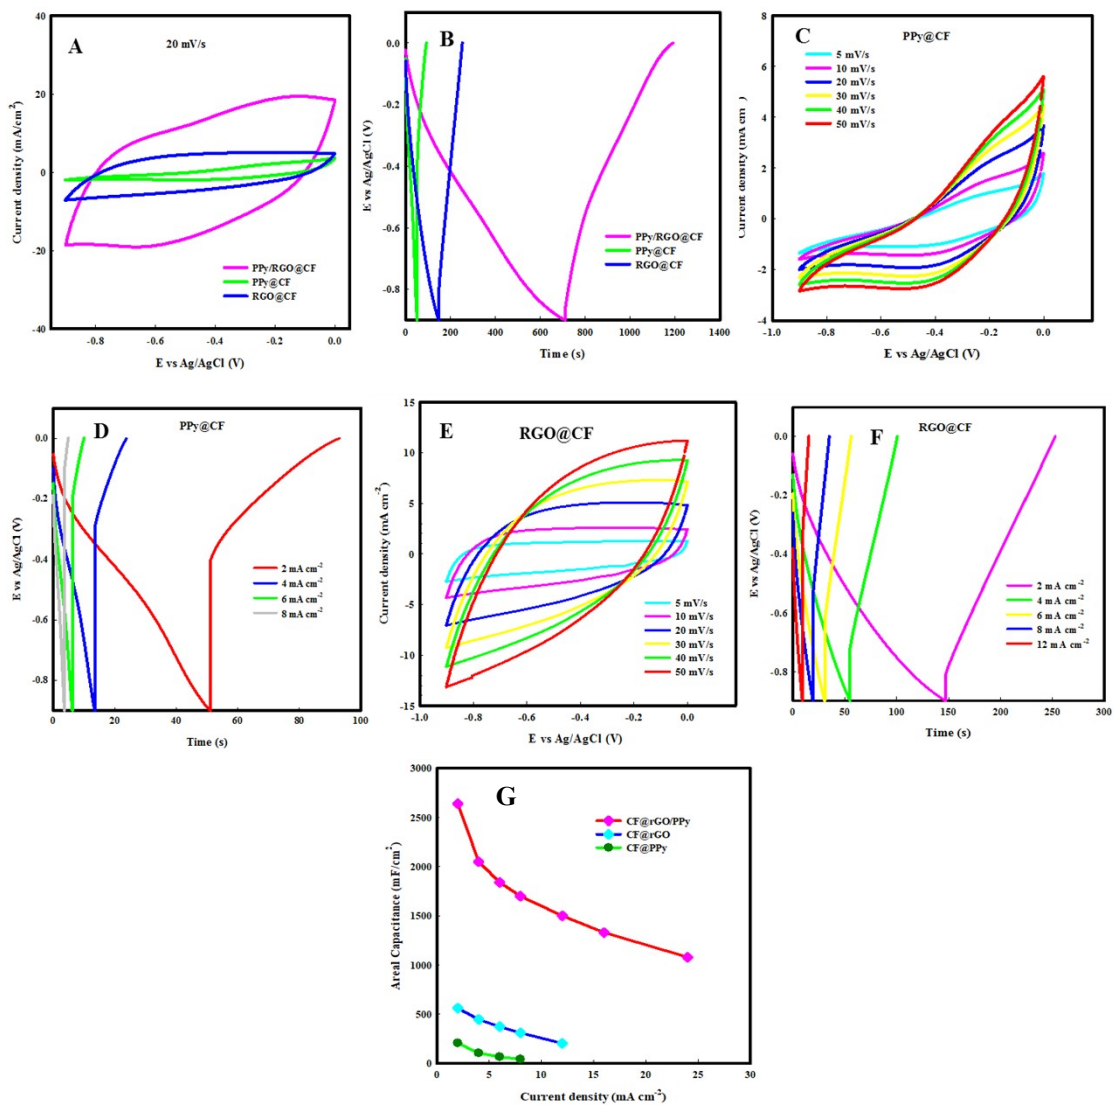

**Fig. S9.** Comparative CV curves of RGO@CF, PPy@CF and PPy/RGO@CF at scan rate of 20 mV/s (A), Comparative GCD curves of RGO@CF, PPy@CF and PPy/RGO@CF (B), CV curve of PPy@CF (C), GCD curve of PPy@CF (D), CV curve of RGO@CF (E) and GCD curve of RGO@CF (F) at 1M KOH electrolyte. (G) areal capacitance of RGO, PPy and PPy/RGO on the CF electrode as function of the current density.

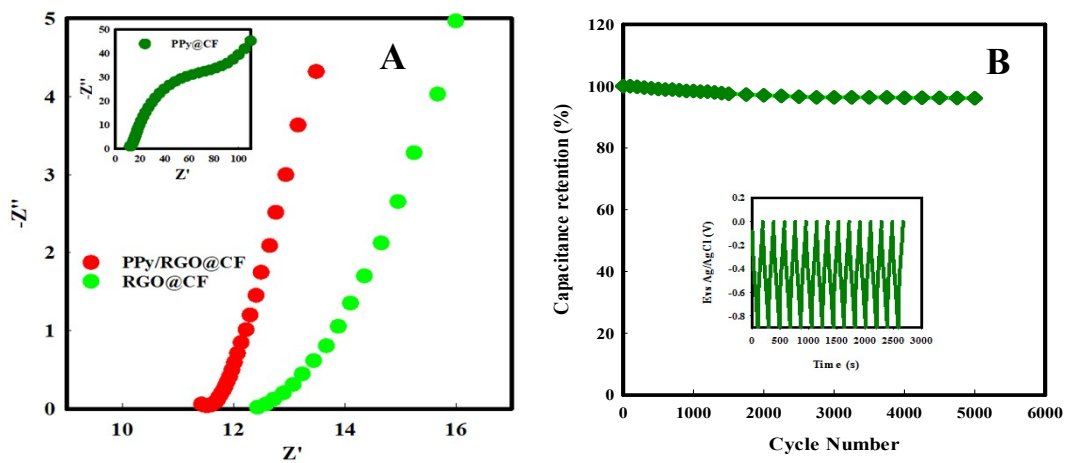

**Fig. S10.** The magnification of the high-frequency region (A), Cycling performance of PPy/RGO@CF (B)

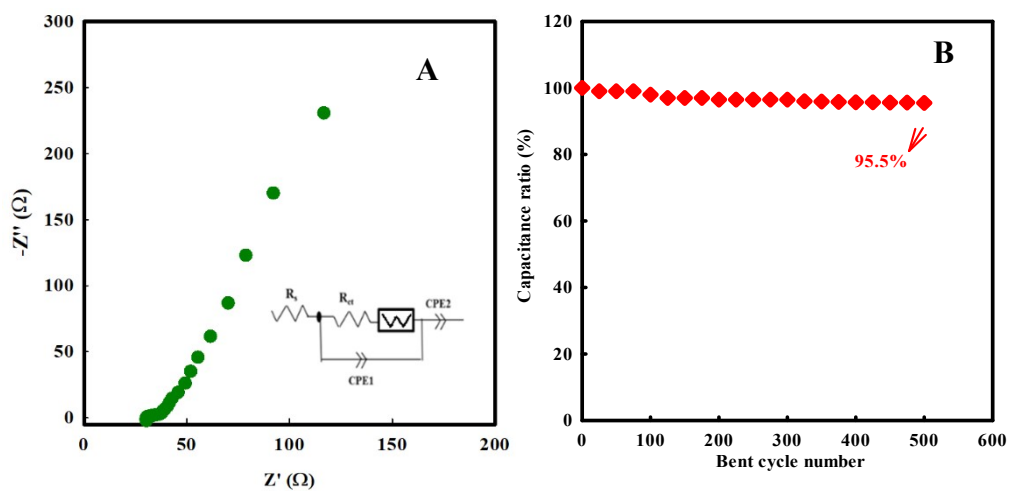

**Fig. S11.** Nyquist plot of the assembled all-solid-state micro- device in a frequency range of 100 kHz to 10 mHz at an open circuit potential (A), Ratio specific capacitance before and after bending of the asymmetric fiber micro-device on bent cycle number (B)

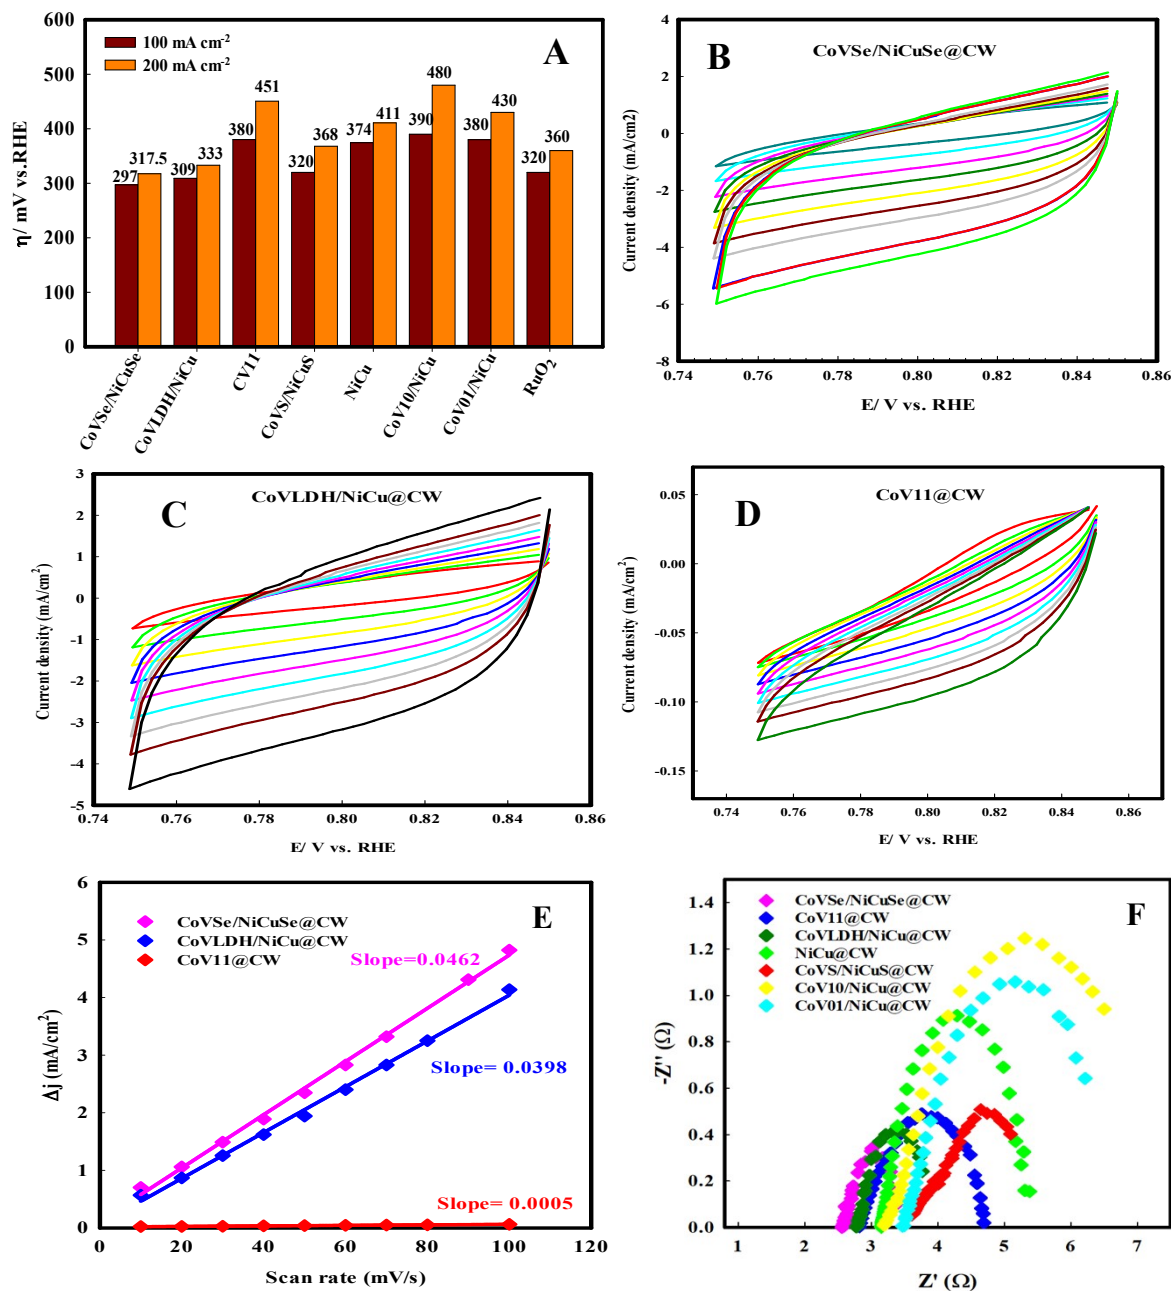

**Fig. S12.** Comparison of overpotentials of NiCu@CW, CoVLDH@CW, CoV01/NiCu@CW, CoV10/NiCu@CW, CoVLDH/NiCu@CW, CoVS/NiCuS@CW, CoVSe/NiCuSe@CW, and RuO<sub>2</sub>@CW obtained at a scan rate of 2 mV s<sup>-1</sup> (A). CV curves of CoVSe/NiCuSe@CW (B), CoVLDH/NiCu@CW (C) and CoV11@CW (D), in 1M KOH with different scan rates (10-100 mV·s<sup>-1</sup>). Linear fitting of the capacitive current densities of CoVLDH/NiCu@CW, CoVLDH@CW, CoVSe/NiCuSe@CW versus scan rates (E). the magnification of the high-frequency region (F).

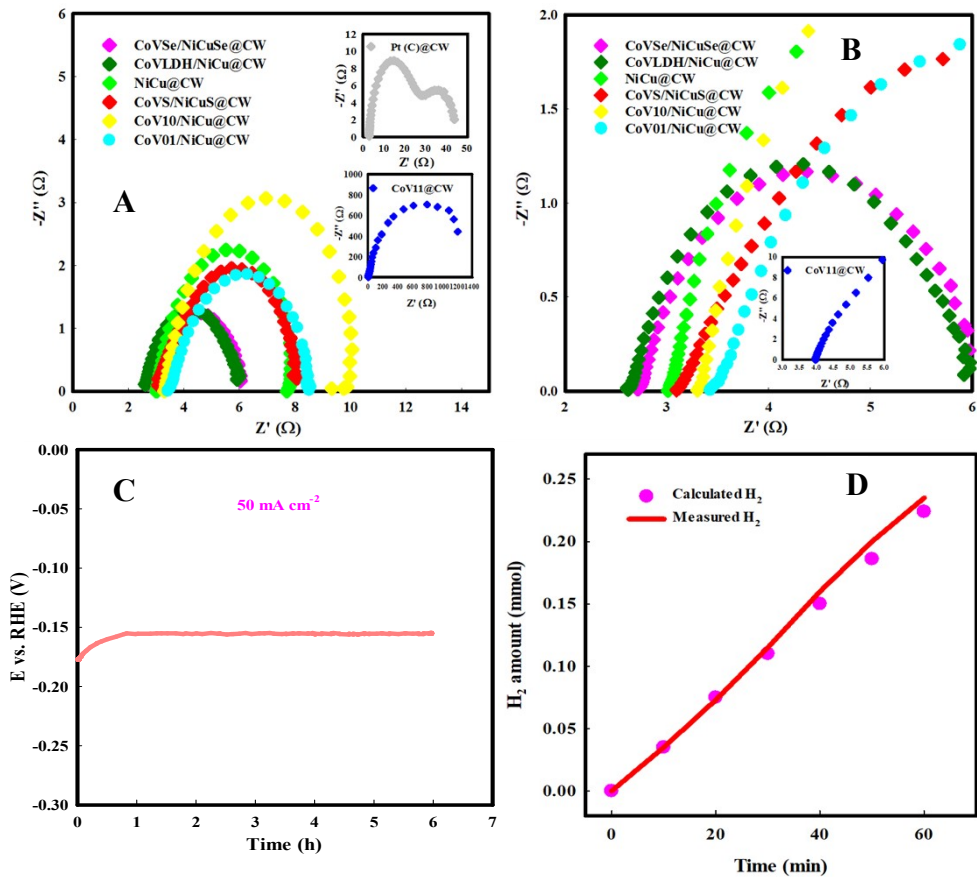

**Fig. S13.** EIS plots of fiber electrodes (A), the magnification of the high-frequency region (B), Time-dependent potential curve of CoVSe/NiCuSe@CW at  $-50 \text{ mA cm}^{-2}$  for 6h (C), The amount of hydrogen theoretically calculated and experimentally measured vs. time for CoVSe/NiCuSe@CW (D).

**Table S1.** Comparison of specific capacitances of the present work and other electrode materials in a three-electrode system

| Electrode materials                            | Substrate    | Electrolyte                        | Current density         | Specific capacitance                                                             | Ref.      |
|------------------------------------------------|--------------|------------------------------------|-------------------------|----------------------------------------------------------------------------------|-----------|
| CoVSe/NiCuSe                                   | Cu wire      | 1M KOH                             | 4 mA cm <sup>-2</sup>   | 5.14 F cm <sup>-2</sup><br>535.4 F cm <sup>-3</sup><br>617.3 mF cm <sup>-1</sup> | This work |
| PEDOT:PSS-rGO/ MnO <sub>2</sub>                | Carbon fiber | 1M Na <sub>2</sub> SO <sub>4</sub> | 5 mA/cm <sup>2</sup>    | 2920 mF/cm <sup>2</sup><br>194.25 F/cm <sup>3</sup><br>549.72 mF/cm              | [1]       |
| CoVSe                                          | Carbon cloth | 2M KOH                             | 1 mA cm <sup>-2</sup>   | 0.327 mAh cm <sup>-2</sup>                                                       | [2]       |
| CoV-LDH                                        | Nickel foam  | 1M KOH                             | 1 A g <sup>-1</sup>     | 1579 F g <sup>-1</sup>                                                           | [3]       |
| CNT/MnO <sub>2</sub>                           | carbon fiber | 2M LiCl                            | 1 A g <sup>-1</sup>     | 277.1 F g <sup>-1</sup>                                                          | [4]       |
| MnNiCo-CH                                      | Carbon fiber | 6M KOH                             | 1 A g <sup>-1</sup>     | 472.23 F g <sup>-1</sup>                                                         | [5]       |
| NiVS/NiCuP                                     | Cu wire      | 1M NaOH                            | 4 mA cm <sup>-2</sup>   | 13.4 F cm <sup>-2</sup><br>1.7 F cm <sup>-1</sup><br>1342.28 F cm <sup>-3</sup>  | [6]       |
| MnCo <sub>2</sub> O <sub>4</sub> /porous Ni/Ni | Cu wire      | 2M KOH                             | 2 mA cm <sup>-2</sup>   | 1.798F cm <sup>-2</sup>                                                          | [7]       |
| CuO@CoFe-LDH                                   | Cu wire      | 1M KOH                             | 2.5 mA cm <sup>-2</sup> | 866 mF cm <sup>-2</sup>                                                          | [8]       |
| 3D-NiCoO <sub>4</sub>                          | Ni wire      | 2M KOH                             | 2.5 mA                  | 38.84F cm <sup>-3</sup>                                                          | [9]       |
| 3D-NiCo <sub>2</sub> S <sub>4</sub>            | Ni wire      | 2M KOH                             | 0.2 mA cm <sup>-1</sup> | 199.74F cm <sup>-3</sup><br>98 mF cm <sup>-1</sup><br>1.248 F cm <sup>-2</sup>   | [10]      |
| PPy-MnO <sub>2</sub>                           | Carbon fiber | 4 M LiCl                           | 50 mA cm <sup>-2</sup>  | 3.95 F cm <sup>-2</sup>                                                          | [11]      |

**Table S2.** Electrochemical properties of recent reported flexible fiber -based supercapacitors

| Supercapacitor                                                        | Electrolyte                        | Voltage window | Capacitance                                           | Energy density                                           | Power density                                             | Stability                                          | Ref              |
|-----------------------------------------------------------------------|------------------------------------|----------------|-------------------------------------------------------|----------------------------------------------------------|-----------------------------------------------------------|----------------------------------------------------|------------------|
| CoVSe/NiCuSe@C W//PPy/RGO@CF                                          | PVA-KOH                            | 1.6 V          | 351.7 mF cm <sup>-2</sup><br>56.73 F cm <sup>-3</sup> | 111.4 μWh cm <sup>-2</sup><br>20.17 mWh cm <sup>-3</sup> | 12900 μW cm <sup>-2</sup><br>2081.14 mW cm <sup>-3</sup>  | 96.7% after 5000 cycles                            | <b>This work</b> |
| CoNi <sub>3</sub> S <sub>4</sub> /E-NZP //rGO (solid state)           | PVA-NaOH                           | 1.8 V          | 241 mF cm <sup>-2</sup><br>18.54 F cm <sup>-3</sup>   | 108.4 μWh cm <sup>-2</sup><br>8.34 mWh cm <sup>-3</sup>  | 9280 μW cm <sup>-2</sup><br>716.9 mW cm <sup>-3</sup>     | 88.89% after 5000 cycles                           | [12]             |
| symmetric Cu@Ni/porous Ni/MnCo <sub>2</sub> O <sub>4</sub>            | PVA-KOH                            | 1.3 V          | 54.8 mF cm <sup>-2</sup><br>–                         | 4.8 μWh cm <sup>-2</sup>                                 | 1040 μW cm <sup>-2</sup>                                  | 93.7% after 5000 cycles                            | [13]             |
| NiCo <sub>2</sub> S <sub>4</sub> //N-rGO                              | PVA-KOH                            | 1 V            | 120 mF cm <sup>-2</sup><br>19.57 F cm <sup>-3</sup>   | 32.67 μWh cm <sup>-2</sup><br>5.33 mWh cm <sup>-3</sup>  | 5352.92 μW cm <sup>-2</sup><br>855.69 mW cm <sup>-3</sup> | 100 % after 5000 cycles                            | [14]             |
| MnO <sub>2</sub> /MGr/Ni                                              | 6 M KOH                            | 0.8 V          | 73.2 mF cm <sup>-2</sup><br>9.8 F cm <sup>-3</sup>    | 0.88 mWh cm <sup>-3</sup>                                | 25 mW cm <sup>-3</sup>                                    | no visible capacitance loss after 5000 cycles      | [15]             |
| Symmetric pErGO@Cuf/Cu wire                                           | PVA/H <sub>3</sub> PO <sub>4</sub> |                | 283.5 mF cm <sup>-2</sup><br>–                        | 39.3 μWh cm <sup>-2</sup>                                | 17.6 μW cm <sup>-2</sup>                                  | 94.5% after 5000 cycles                            | [16]             |
| VN NWAs/ CNTFs//Co <sub>3</sub> O <sub>4</sub> NWAs/CNTF              | KOH-PVA                            | 1.6 V          | 44.4 F cm <sup>-3</sup>                               | 15.79 mWh cm <sup>-3</sup>                               | 3260 mW cm <sup>-3</sup>                                  | less than 6.88% capacitance loss after 4000 cycles | [17]             |
| NiCo <sub>2</sub> O <sub>4</sub> @ Ni(OH) <sub>2</sub> /CNTF//VN/CNTF | KOH/PVA                            | 1.6 V          | 291.9 mF cm <sup>-2</sup><br>106.1 F cm <sup>-3</sup> | 103.8 μWh cm <sup>-2</sup>                               | 0.8 mW cm <sup>-2</sup>                                   | 87.2% after 5000 cycles                            | [18]             |
| Ni/NiO/Ni(OH) <sub>2</sub> /PE DOT//Ni/CMK-3                          | PVA/KOH                            | 1.45 V         | 31.6 mF cm <sup>-2</sup><br>3.16 F cm <sup>-3</sup>   | 11 μWh cm <sup>-2</sup>                                  | 7800 μW cm <sup>-2</sup>                                  | slight fluctuation for 1400 cycles                 | [19]             |
| MnO <sub>2</sub> /RGO/CF//GH/CW                                       | PAAK/KCl                           | 1.6 V          | 50.8 mF cm <sup>-2</sup><br>2.54 F cm <sup>-3</sup>   | 18.1 μWh cm <sup>-2</sup><br>0.9 mWh cm <sup>-3</sup>    | 200 mW cm <sup>-3</sup>                                   | 90% after 10000 cycles                             | [20]             |
| Ni(OH) <sub>2</sub> RGO/Ni //RGO/Ni                                   | PVA/KOH                            | 1.6 V          | –<br>2.32 F cm <sup>-3</sup>                          | 0.83 mWh cm <sup>-3</sup>                                | 3430 mW cm <sup>-3</sup>                                  | ~83% after 6000 cycles                             | [21]             |
| Symmetric NiCo <sub>2</sub> O <sub>4</sub> / Ni fiber                 | PVA-KOH                            | 1 V            |                                                       | 0.21 mWh cm <sup>-3</sup>                                | 15.5 mW cm <sup>-3</sup>                                  | 100% after 5000 cycles                             | [22]             |
| Ni <sub>3</sub> S <sub>2</sub> /Ni wire// Pen ink electrode           | PVA/KOH                            | 1.4 V          | 34.3 F g <sup>-1</sup><br>87.25 mF cm <sup>-1</sup>   | 8.2 Wh kg <sup>-1</sup> 0.81 mWh cm <sup>-3</sup>        | 2.9 kW kg <sup>-1</sup><br>285 mW cm <sup>-3</sup>        | 93.1% after 5000 cycles                            | [23]             |
| Symmetric AT-PEDOT:PSS/PPy                                            | PVA/H <sub>2</sub> SO <sub>4</sub> | 0.8 V          | 770.6 mF cm <sup>-2</sup><br>393.8 F cm <sup>-3</sup> | 16.2 μWh cm <sup>-2</sup><br>8.3 mWh cm <sup>-3</sup>    | At 761.5 μW cm <sup>-2</sup><br>389.1 mW cm <sup>-3</sup> | 71.4% after 10000 cycles                           | [24]             |
| NPG@MnO <sub>2</sub> //CNT/Carbon paper                               | LiCl/PVA                           | 1.8 V          | 12 mF cm <sup>-2</sup><br>–                           | 5.4 μWh cm <sup>-2</sup>                                 | 2531 μW cm <sup>-2</sup>                                  | 90% after 2000 cycles                              | [25]             |
| Ni-Co DHs/nickel/pen ink/CF                                           | PVA-KOH                            | 1.55 V         | 28.67 mF cm <sup>-2</sup>                             | 9.57 μWh cm <sup>-2</sup>                                | 1841.1 μW cm <sup>-2</sup>                                | 86% after 5000 cycles                              | [26]             |
| NC/VG@CNTF//VG@CNTF                                                   | PVA-KOH                            | 1.80 V         | 188 F g <sup>-1</sup>                                 | 90.0 Wh kg <sup>-1</sup>                                 | 100 kW kg <sup>-1</sup>                                   |                                                    | [27]             |
| Ni/Ni(OH) <sub>2</sub> //Ni/OMC                                       | PVA-KOH                            | 1.5 V          | 35.67 mF cm <sup>-2</sup><br>–                        | 10 μWh cm <sup>-2</sup><br>2.16 mWh cm <sup>-3</sup>     | 7300 μW cm <sup>-2</sup><br>1600 mW cm <sup>-3</sup>      | 70% after 10 000 cycles                            | [28]             |
| N- QD/GH/CF//GH/CF                                                    | PVA/H <sub>2</sub> SO <sub>4</sub> | 2 V            | 6.6 F cm <sup>-3</sup>                                | 3.6 mW h cm <sup>-3</sup>                                | 355.6 mW cm <sup>-3</sup>                                 | 81.1% after 6000 cycles                            | [29]             |
| NiCo LDH@GSS@CF-NF//AC                                                | PVA-KOH                            | 1.5 V          | 350.9 mF cm <sup>-2</sup><br>1.949 F cm <sup>-3</sup> | 109.6 μWh cm <sup>-2</sup><br>0.61 mWh cm <sup>-3</sup>  | 14997.6 μW cm <sup>-2</sup>                               | 90.5% after 3000 cycles                            | [30]             |



**Table S3.** Comparison of OER activity with some non-noble metal based OER electrocatalysts.

| Catalyst                                                                                                                                 | Substrate                     | Electrolyte | Current density (mA cm <sup>-2</sup> ) | $\eta$ (mV) | Tafel Slope (mV. dec <sup>-1</sup> ) | Ref       |
|------------------------------------------------------------------------------------------------------------------------------------------|-------------------------------|-------------|----------------------------------------|-------------|--------------------------------------|-----------|
| CoVSe/NiCuSe                                                                                                                             | Cu Wire                       | 1.0 M KOH   | 100                                    | 297         | 67                                   | This work |
|                                                                                                                                          |                               |             | 200                                    | 317         |                                      |           |
|                                                                                                                                          |                               |             | 600                                    | 350         |                                      |           |
| CoSe <sub>2</sub> microspheres                                                                                                           | GCE                           | 1.0 M KOH   | 10                                     | 330         | 79                                   | [31]      |
| CoSe <sub>2</sub> ultrathin nanosheets                                                                                                   | CFC                           | 1.0 M KOH   | 10                                     | 320         | 44                                   | [32]      |
| CoSe <sub>0.85</sub><br>(Ni <sub>1</sub> Co) <sub>Se<sub>0.85</sub></sub><br>(Ni <sub>1</sub> Co) <sub>Se<sub>0.85</sub></sub> -NiCo LDH | CFC                           | 1.0 M KOH   | 10                                     | 324         | 85                                   | [33]      |
|                                                                                                                                          |                               |             | 10                                     | 216         | 79                                   |           |
|                                                                                                                                          |                               |             | 10                                     | 255         | 77                                   |           |
| CoSe <sub>2</sub> @C-CNT                                                                                                                 | Carbon Cloth                  | 1.0 M KOH   | 10<br>50                               | 306<br>345  | 46                                   | [34]      |
| CoSe <sub>2</sub> @N/C-CNT                                                                                                               | GCE                           | 1.0 M KOH   | 10                                     | 340         | 107                                  | [35]      |
| ZIF-Co <sub>0.85</sub> Se                                                                                                                | GCE                           | 1.0 M KOH   | 10                                     | 360         | 62                                   | [36]      |
| CoO/CoSe <sub>2</sub>                                                                                                                    | Ti mesh                       | PBS         | 10                                     | 510         | 137                                  | [37]      |
| Zn-doped CoSe <sub>2</sub>                                                                                                               | carbon fabric collector (CFC) | 1.0 M KOH   | 10                                     | 356         | 88                                   | [38]      |

## Reference:

- [1] L. Naderi, S. Shahrokhian, F. Soavi, *J. Mater. Chem. A*, 2020, **8**, 19588-19602.
- [2] A. K. Das, B. Ramulu, E. G. Shankar, J. S. Yu, *Chem. Eng. J.*, 2022, **429**, 132486
- [3] S. C. Lee, M. Kim, J.H. Park, E. S. Kim, Sh. Liu, K. Y. Chung, S. Ch. Jun, *J. Power Sources*, 2021, **486**, 229341.
- [4] T. Cenab, L.Chena, X. Zhang, Y. Tian, X. Fan, *Electrochim. Acta*, 2021, **367**, 137488
- [5] X. Cao, Y. Liu, Y. Zhong, L. Cui, A. Zhang, J. M. Razal, W. Yang, J. Liu, *J. Mater. Chem. A*, 2020, **8**, 1837-1848.
- [6] L. Naderi, S. Shahrokhian, *Chem. Eng. J.*, 2020, **392**, 124880.
- [7] Y. Ji, J. Xie, J. Wu, Y. Yang, X.Z. Fua, R. Sun, C.P. Wong, *J. Power Sources*, 2018, **393** 54–61.
- [8] Z. Li, M. Shaon, L. Zhou, R. Zhang, C. Zhang, J. Han, M. Wein, D.G. Evans, X. Duan, *Nano Energy*, 2016, **20**, 294–304.
- [9] A. Ramadoss, K.-N. Kang, H.-J. Ahn, S.-I. Kim, S.-T. Ryu, J.-H. Jang, *J. Mater. Chem. A*, 2016, **4**, 4718–4727.
- [10] B. Saravanakumar, S.S. Jayaseelan, M.K. Seo, H.Y. Kim, B.S. Kim, *Nanoscale*, 2017, **9**, 18819-18834.
- [11] W. Liu, N. Liu, Y. Shi, Y. Chen, C. Yang, J. Tao, S. Wang, Y. Wang, J. Su, L. Li, Y. Gao. *J. Mater. Chem. A*, 2015, **3**, 13461-13467.
- [12] S. Shahrokhian, L. Naderi, *J. Phys. Chem. C*, 2019, **123**, 21353–21366.

- [13] Y. Ji, J. Xie, J. Wu, Y. Yang, X.Z. Fu, R. Sun, C.P. Wong, *J. Power Sources* 2018, **393**, 54–61.
- [14] B. Saravanakumar, S.S. Jayaseelan, M.K. Seo, H.Y. Kim, B.S. Kim, *Nanoscale*, 2017, **9** 18819–18834.
- [15] M. Hu, Y. Liu, M. Zhang, H. Wei, Y. Gao, *J. Power Sources*, 2016, **335**, 113–120.
- [16] T. Purkait, G. Singh, D. Kumar, M. Singh, R.S. Dey, *Sci. Rep.*, 2018, **8**, 640–653.
- [17] J. Sun, P. Man, Q. Zhang, B. He, Zh. Zhou, Ch. Li, X. Wang, J. Guo, J. Zhao, L. Xie, Q. Li, J. Sun, G. Hong, Y. Yao, *Appl. Surf. Sci.*, 2018, **447**, 795–801.
- [18] X. Wang, J. Sun, J. Zhao, Zh. Zhou, Q. Zhang, Ch. Wong, Y. Yao., *J. Phys. Chem. C*, 2019, **123**, 985-993.
- [19] H. Yang, H. Xu, M. Li, L. Zhang, Y. Huang, X. Hu, *ACS Appl. Mater. Interfaces*, 2016, **8**, 1774–1779.
- [20] Z. Zhang, F. Xiao, S. Wang, *J. Mater. Chem. A*, 2015, **3**, 11215–11223.
- [21] K. Lu, J. Zhang, Y. Wang, J. Ma, B. Song, H. Ma, *ACS Sustainable Chem. Eng.*, 2017, **5**, 821–827.
- [22] A. Ramadoss, K.N. Kang, H.J. Ahn, S.I. Kim, S.T. Ryu, J.H. Jang, *J. Mater. Chem. A*, 2016, **4**, 4718–4727.
- [23] J. Wen, S. Li, K. Zhou, Z. Song, B. Li, Z. Chen, T. Chen, Y. Guo, G. Fang, *J. Power Sources*, 2016, **324**, 325–333.
- [24] W. Teng, Q. Zhou, X. Wang, H. Che. P. Hu, H. Li, J. Wang. *Chem. Eng. J.*, 2020, **390**, 124569.
- [25] H. Xu, X. Hu, Y. Sun, H. Yang, X. Liu, Y. Huang, *Nano Res.*, 2015, **8**, 1148–1158.
- [26] L. Gao, J. U. Surjadi, K. Cao, H. Zhang, P. Li, Sh. Xu, Ch. Jiang, J. Song, D. Sun, Y. Lu, *ACS Appl. Mater. Interfaces*, 2017, **9**, 5409–5418
- [27] J. G. Kim, H. Yu, J.Y. Jung, M. J. Kim, D. Y. Jeon, H. S. Jeong, N. D. Kim, *Adv. Funct. Mater.*, 2022, 2113057.
- [28] X. Dong, Z. Guo, Y. Song, M. Hou, J. Wang, Y. Wang, Y. Xia, *Adv. Funct. Mater.*, 2014, **24**, 3405–3412.
- [29] Z. Li, J. Wei, J. Ren, X. Wua, L. Wang, D. Pan, M. Wu, *Carbon*, 2019, **154**, 410-419.

- [30] L. Gao, J. Song, J. U. Surjadi, K. Cao, Y. Han, D. Sun, X. Tao, Y. Lu., *ACS Appl. Mater. Interfaces*, 2018, **10**, 28597-28607.
- [31] X. Liu, Y. Liu, L. Z. Fan, *J. Mater. Chem. A*, 2017, **5**, 15310-15314.
- [32] Y. Liu, H. Cheng, M. Lyu, S. Fan, Q. Liu, W. Zhang, Y. Zhi, C. Wang, C. Xiao, S. Wei, B. Ye and Y. Xie, *J. Am. Chem. Soc.*, 2014, **136**, 15670–15675.
- [33] Ch. Xia, Q. Jiang, Ch. Zhao, M. N. Hedhili, H. N. Alshareef, *Adv. Mater.*, 2016, **28**, 77–85.
- [34] M. Yuan, M. Wang, P. Lu, Y. Sun, S. Dipazir, J. Zhang, S. Li, G. Zhang, *J. Colloid Interface Sci.*, 2019, **533**, 503-512.
- [35] H. Ding, G. Xu, L. Zhang, B. Wei, J. Hei, L. Chen, *J. Colloid Interface Sci.*, 2020, **566**, 296-303.
- [36] S. Li, S. Peng, L. Huang, X. Cui, A. M. Al-Enizi, G. Zheng, *ACS Appl. Mater. Interfaces*, 2016, **8**, 20534–20539.
- [37] K. Li, J. Zhang, R. Wu, Y. Yu, B. Zhang, *Adv. Sci.*, 2016, **3**, 1500426.
- [38] Q. Dong, Q. Wang, Z. Dai, H. Qiu, X. Dong, *ACS Appl. Mater. Interfaces*, 2016, **8**, 26902–26907.
